# Supplementary material
Source: PubMed Central journal article supplement (PMC6143074)

## Supplementary Online Content

Franceschini N, Kopp JB, Barac A, et al. Association of *APOL1* with heart failure with preserved ejection fraction in postmenopausal African American women. *JAMA Cardiol*. Published online July 3, 2018. doi:10.1001/jamacardio.2018.1827

**eTable 1.** Baseline characteristics of individuals developing heart failure, by heart failure subtype

**eTable 2.** Association of *APOL1* with ESRD and cardiovascular outcomes in a subsample with genome-wide association data

**eTable 3.** Association of *APOL1* with cardiovascular disease outcomes using number of copies of *APOL1* risk status.

**eTable 4.** Estimated power for two-sample comparison of survivor functions, using a two-sided test and  $\alpha=0.05$ .

**eFigure.** Correlation of imputed and genotype variants and *APOL1* risk groups.

This supplementary material has been provided by the authors to give readers additional information about their work.

eTable 1. Baseline characteristics of individuals developing heart failure, by heart failure subtype

| Characteristics                             | Unclassified heart failure (n=95) | HFpEF (n=154)        | HFrEF (n=144)       |
|---------------------------------------------|-----------------------------------|----------------------|---------------------|
| Age, mean (SD), years                       | 65.8 (7.7)                        | 64.9 (7.1)           | 63.8 (7.5)          |
| Education, < high school, No. (%)           | 13 (13.7)                         | 23 (14.9)            | 41 (18.8)           |
| Ever smoker, No. (%)                        | 52 (54.7)                         | 88 (57.1)            | 77 (53.5)           |
| Overweight/obese, No. (%)                   | 17 (17.9)/69 (72.6)               | 38 (24.8)/108 (70.6) | 50 (36.0)/70 (50.4) |
| Diabetes, No. (%)                           | 21 (22.1)                         | 49 (31.8)            | 41 (28.5)           |
| Hypertension, No. (%)                       | 78 (82.1)                         | 121 (78.6)           | 113 (78.5)          |
| History of cardiovascular disease, No. (%)  | 42 (44.2)                         | 55 (36.2)            | 59 (41.6)           |
| eGFR, mean (SD), ml/min/1.73 m <sup>2</sup> | 84.3 (23.9)                       | 82.8 (23.4)          | 86.3 (23.9)         |
| CKD, No. (%)                                | 15 (15.8)                         | 28 (18.2)            | 20 (13.9)           |
| <i>APOLI</i> high risk/low risk, No. (%)    | 10 (10.5)                         | 26 (16.8)            | 18 (12.5)           |

Three participants who recovered ejection fraction acute decompensated heart failure are not included in the subtype classification.

eTable 2. Association of *APOLI* with ESRD and cardiovascular outcomes in a subsample with genome-wide association data

| Incident outcomes                 | Total No. | No. Events                     | <i>Model 1</i>    | <i>Model 2</i>    | <i>Model 3</i>     |
|-----------------------------------|-----------|--------------------------------|-------------------|-------------------|--------------------|
|                                   |           | <i>APOLI</i> low<br>/high risk | HR (95% CI)       | HR (95% CI)       | HR (95% CI)        |
| ESRD                              | 7,819     | 153/29                         | 1.28 (0.84, 1.93) | 1.26 (0.83, 1.90) | 0.89 (0.58,1.37)   |
| CHD <sup>a</sup>                  | 6,217     | 463/67                         | 1.15 (0.89, 1.49) | 1.20 (0.93, 1.56) | 1.19 (0.92, 1.55)  |
| All-cause stroke                  | 7,819     | 398/49                         | 0.90 (0.67, 1.21) | 0.83 (0.66, 1.21) | 0.86 (0.64, 1.16)  |
| Ischemic stroke                   | 7,819     | 279/30                         | 0.78 (0.54, 1.14) | 0.79 (0.54, 1.15) | 0.76 (0.52, 1.12)  |
| All-cause heart failure           | 7,797     | 302/50                         | 1.27 (0.94, 1.71) | 1.24 (0.91, 1.67) | 1.19 (0.88, 1.61)  |
| HFpEF <sup>b</sup>                | 7,672     | 117/25                         | 1.69 (1.10, 2.61) | 1.61 (1.04, 2.50) | 1.55 (0.997, 2.40) |
| HFrEF <sup>b</sup>                | 7,655     | 108/17                         | 1.19 (0.71, 1.98) | 1.16 (0.69, 1.94) | 1.13 (0.67, 1.89)  |
| All-cause death                   | 7,819     | 1,430/194                      | 1.04 (0.90, 1.21) | 1.02 (0.87, 1.18) | 0.99 (0.85, 1.16)  |
| Cardiovascular death              | 7,819     | 514/75                         | 1.10 (0.86, 1.40) | 1.06 (0.83, 1.35) | 1.03 (0.80, 1.31)  |
| Composite CHD/stroke <sup>a</sup> | 6,217     | 621/83                         | 1.03 (0.82, 1.30) | 1.06 (0.84, 1.33) | 1.04 (0.83, 1.32)  |

<sup>a</sup> exclusion of prevalent cases. <sup>b</sup> unclassified heart failure events were excluded.

Model 1: Adjusted for age, waist, education, income, region, smoking, systolic and diastolic blood pressures, hypertension treatment, diabetes, enrolled in OS vs CT, and use of lipid medications. Model 2, Model 1 and further adjusted for the first three principal components of ancestry. Model 3: Model 2 further adjusted for baseline glomerular filtration rate.

eTable 3. Association of *APOLI* with cardiovascular disease outcomes using number of copies of *APOLI* risk status.

| Incident outcomes                 |                   |                    |  |
|-----------------------------------|-------------------|--------------------|--|
|                                   | HR (95% CI)       | <i>p</i> for trend |  |
| CHD                               | 1.04 (0.92, 1.18) | 0.51               |  |
| All-cause stroke                  | 0.98 (0.86, 1.11) | 0.73               |  |
| Ischemic stroke                   | 0.97 (0.83, 1.13) | 0.66               |  |
| All-cause heart failure           | 1.00 (0.87, 1.17) | 0.96               |  |
| HFpEF                             | 1.13 (0.90, 1.44) | 0.30               |  |
| HFrEF                             | 0.97 (0.76, 1.24) | 0.80               |  |
| All-cause death                   | 1.03 (0.96, 1.10) | 0.46               |  |
| Cardiovascular death              | 1.03 (0.92, 1.16) | 0.59               |  |
| Composite CHD and ischemic stroke | 1.03 (0.93, 1.14) | 0.63               |  |

Additive genetic models using *APOLI* risk categories of zero, 1 and 2 copies of risk genotypes, adjusted for age, waist, education, income, region, smoking, systolic and diastolic blood pressures, hypertension treatment, diabetes, enrolled in OS vs CT, and use of lipid medications. HR, hazard ratio; CI, confidence interval

eTable 4. Estimated power for two-sample comparison of survivor functions, using a two-sided test and alpha=0.05.

| Sample=11,137 |                             |      |      |      |      |      |      |      |
|---------------|-----------------------------|------|------|------|------|------|------|------|
| Hazard ratio  | Control/cases ratio (N2/N1) |      |      |      |      |      |      |      |
|               | 5                           | 10   | 20   | 30   | 40   | 50   | 60   | 70   |
| 1.1           | 0.96                        | 0.81 | 0.54 | 0.39 | 0.30 | 0.25 | 0.21 | 0.18 |
| 1.2           | 1.00                        | 0.99 | 0.98 | 0.92 | 0.82 | 0.72 | 0.63 | 0.55 |
| 1.3           | 1.00                        | 1.00 | 1.00 | 0.99 | 0.99 | 0.97 | 0.93 | 0.88 |
| 1.4           | 1.00                        | 1.00 | 1.00 | 1.00 | 0.99 | 0.99 | 1.00 | 0.99 |
| 1.5           | 1.00                        | 1.00 | 1.00 | 1.00 | 1.00 | 1.00 | 1.00 | 1.00 |
| Sample=7,796  |                             |      |      |      |      |      |      |      |
| 1.1           | 0.87                        | 0.65 | 0.40 | 0.28 | 0.22 | 0.18 | 0.15 | 0.13 |
| 1.2           | 1.00                        | 1.00 | 0.92 | 0.78 | 0.65 | 0.54 | 0.46 | 0.39 |
| 1.3           | 1.00                        | 1.00 | 1.00 | 0.98 | 0.94 | 0.87 | 0.79 | 0.71 |
| 1.4           | 1.00                        | 1.00 | 1.00 | 1.00 | 0.99 | 0.98 | 0.96 | 0.92 |
| 1.5           | 1.00                        | 1.00 | 1.00 | 1.00 | 1.00 | 1.00 | 1.00 | 0.99 |

In red, power above 80%.

For sample n=11,137: N2/N1 ratio CHD=18, all-cause stroke=20, ischemic stroke=29, all-cause heart failure=27, HFpEF=71, HFrEF=76, all-cause death=5, cardiovascular death=17.

For sample n=7,796: N2/N1 ratio CHD=16, all-cause stroke=24, ischemic stroke=21, all-cause heart failure=54, HFpEF=61, HFrEF=4, all-cause death=12, cardiovascular death=10.

eFigure 1. Correlation of imputed and genotype variants and *APOL1* risk groups. Graphs showed the kernel density estimates by subgroups. Note that genotypes are coded 0, 1 or 2 copies but imputed data is a continuous number between 0 and 2. Figure 1A. G1 allele (rs73885319), Figure 1B. G2 allele (rs71785313), Figure 1C. Combined G1/G2 alleles: 0 risk alleles (G0/G0), 1 risk allele (G1/G0, G2/G0), 2 risk alleles (G1/G1, G2/G2, G1/G2).

A

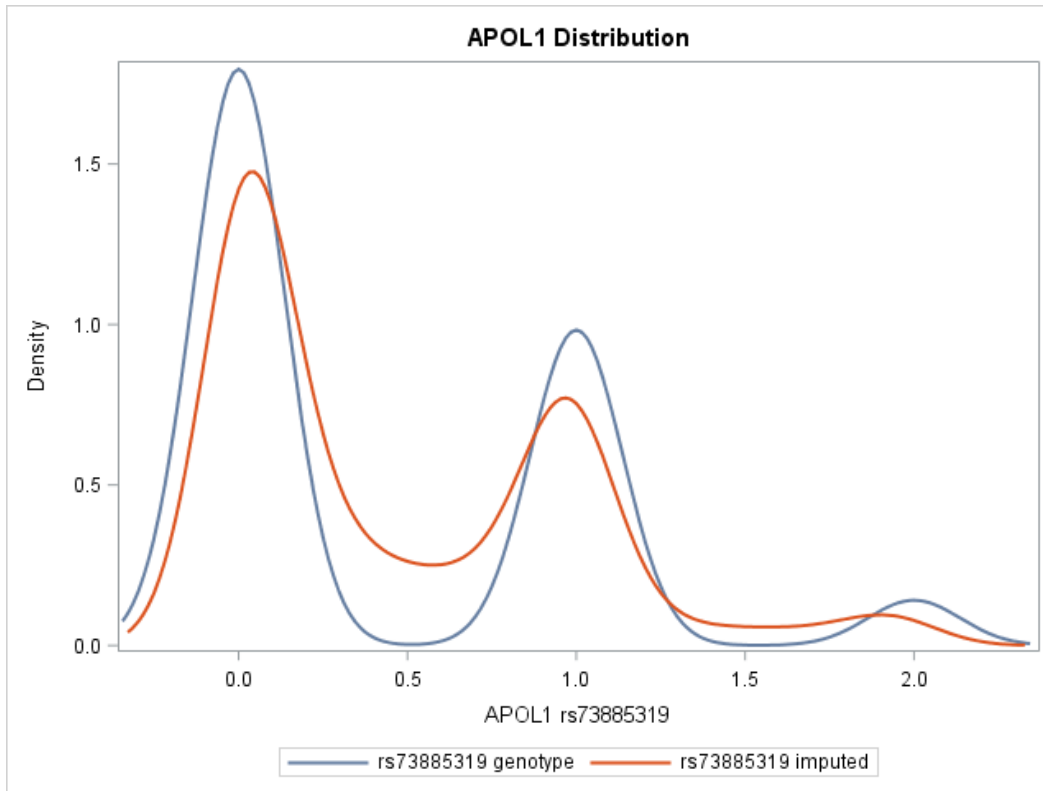

B

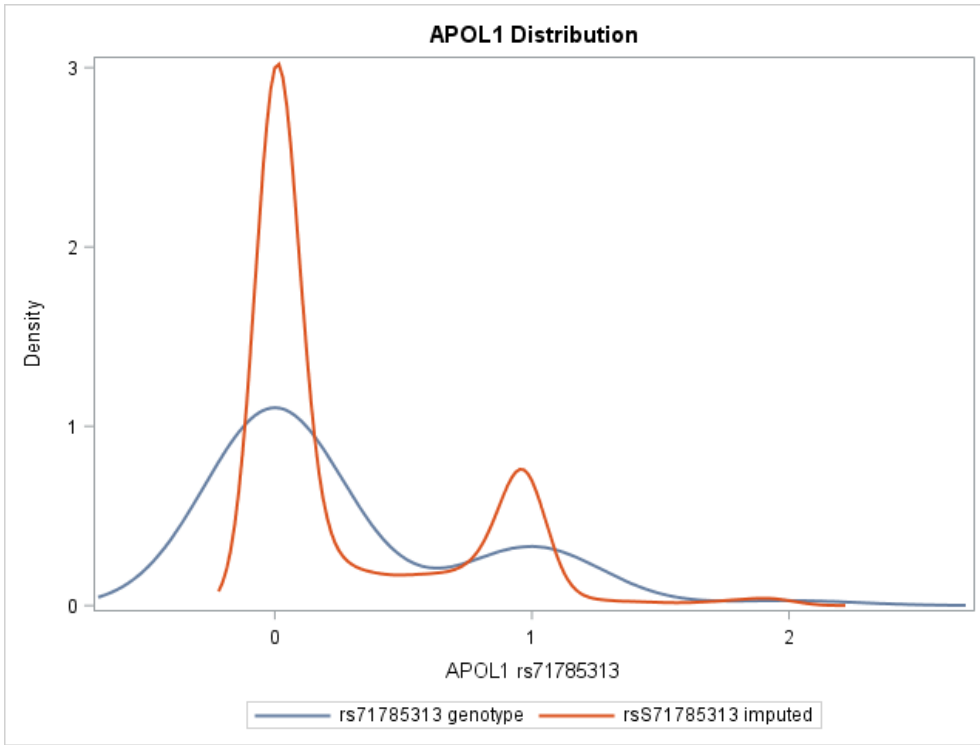

C

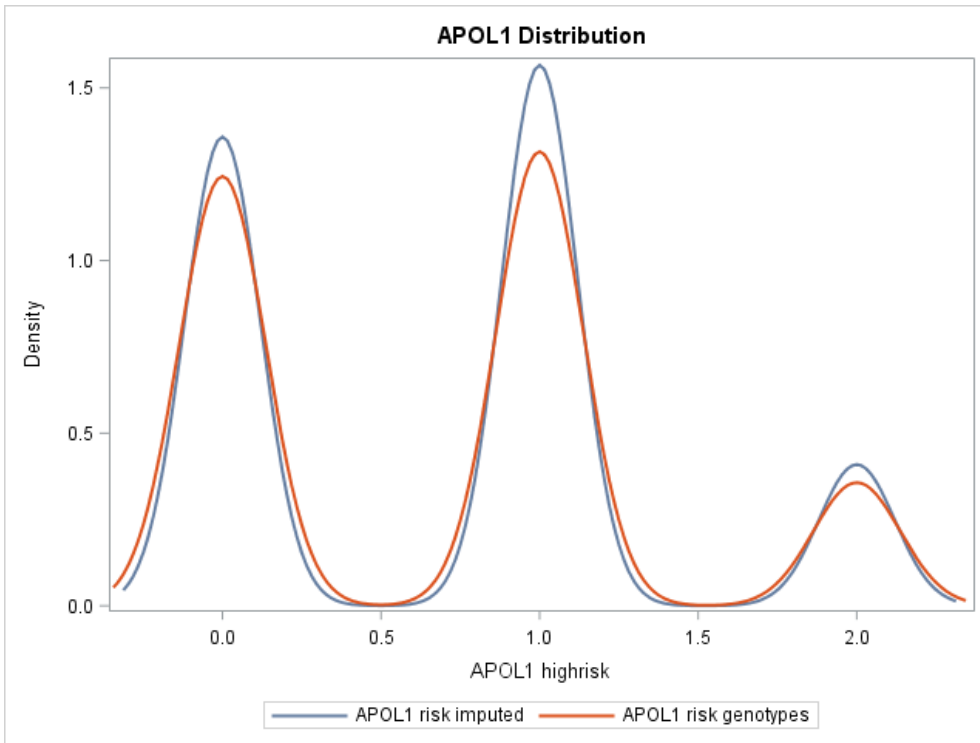

Supplement: jamacardiol-3-712-s001.pdf [file jamacardiol-3-712-s001.pdf]
